# Supplementary material for: Self-rated health, quality of life and appetite as predictors of initiation of dialysis and mortality in patients with chronic kidney disease stages 4–5: a prospective cohort study
Source: PubMed Central journal article supplement (PMC5994035; doi:10.1186/s13104-018-3472-9), 2018-06-08

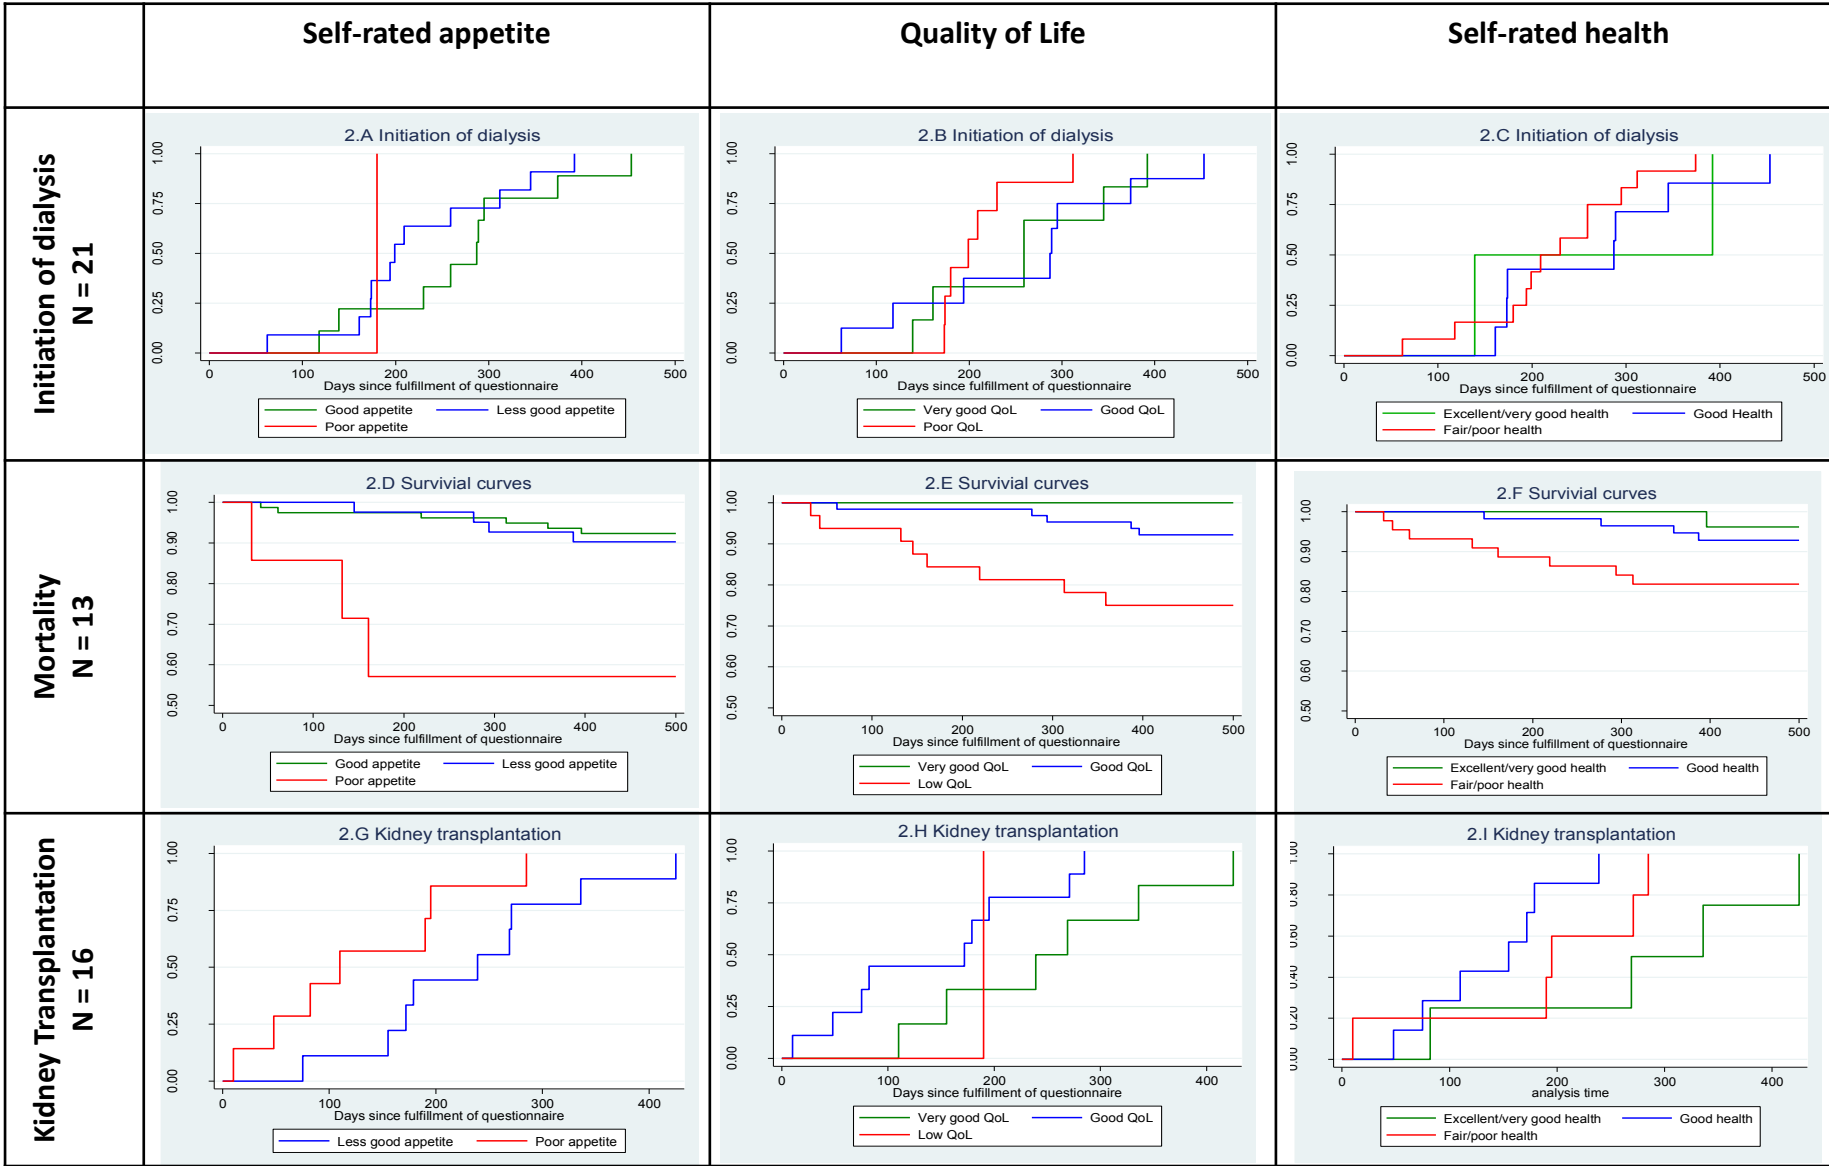

Supplement: 13104_2018_3472_MOESM3_ESM.pdf [file 13104_2018_3472_MOESM3_ESM.pdf]
