# Supplementary material for: Self-rated health, quality of life and appetite as predictors of initiation of dialysis and mortality in patients with chronic kidney disease stages 4–5: a prospective cohort study
Source: BMC Res Notes. 2018 Jun 8;11:371. doi: 10.1186/s13104-018-3472-9 (PMC5994035; doi:10.1186/s13104-018-3472-9)
Supplement: Supplementary file 1 — Additional file 1. The Questionnaire (Method/data collection). [file 13104_2018_3472_MOESM1_ESM.pdf]

## YOUR KIDNEY DISEASE

During the past 4 weeks, to what extent were you bothered by each of the following?

|                              |                                        |                                      |                                        |                                       |                                       |
|------------------------------|----------------------------------------|--------------------------------------|----------------------------------------|---------------------------------------|---------------------------------------|
| Nausea                       | <input type="checkbox"/><br>Not at all | <input type="checkbox"/><br>Somewhat | <input type="checkbox"/><br>Moderately | <input type="checkbox"/><br>Very much | <input type="checkbox"/><br>Extremely |
| Vomiting                     | <input type="checkbox"/><br>Not at all | <input type="checkbox"/><br>Somewhat | <input type="checkbox"/><br>Moderately | <input type="checkbox"/><br>Very much | <input type="checkbox"/><br>Extremely |
| Itchy skin                   | <input type="checkbox"/><br>Not at all | <input type="checkbox"/><br>Somewhat | <input type="checkbox"/><br>Moderately | <input type="checkbox"/><br>Very much | <input type="checkbox"/><br>Extremely |
| Shortness of breath          | <input type="checkbox"/><br>Not at all | <input type="checkbox"/><br>Somewhat | <input type="checkbox"/><br>Moderately | <input type="checkbox"/><br>Very much | <input type="checkbox"/><br>Extremely |
| Thirst                       | <input type="checkbox"/><br>Not at all | <input type="checkbox"/><br>Somewhat | <input type="checkbox"/><br>Moderately | <input type="checkbox"/><br>Very much | <input type="checkbox"/><br>Extremely |
| Swollen legs                 | <input type="checkbox"/><br>Not at all | <input type="checkbox"/><br>Somewhat | <input type="checkbox"/><br>Moderately | <input type="checkbox"/><br>Very much | <input type="checkbox"/><br>Extremely |
| Leg cramps                   | <input type="checkbox"/><br>Not at all | <input type="checkbox"/><br>Somewhat | <input type="checkbox"/><br>Moderately | <input type="checkbox"/><br>Very much | <input type="checkbox"/><br>Extremely |
| Dizziness                    | <input type="checkbox"/><br>Not at all | <input type="checkbox"/><br>Somewhat | <input type="checkbox"/><br>Moderately | <input type="checkbox"/><br>Very much | <input type="checkbox"/><br>Extremely |
| Difficulty concentrating     | <input type="checkbox"/><br>Not at all | <input type="checkbox"/><br>Somewhat | <input type="checkbox"/><br>Moderately | <input type="checkbox"/><br>Very much | <input type="checkbox"/><br>Extremely |
| Washed out or drained        | <input type="checkbox"/><br>Not at all | <input type="checkbox"/><br>Somewhat | <input type="checkbox"/><br>Moderately | <input type="checkbox"/><br>Very much | <input type="checkbox"/><br>Extremely |
| Difficulty remembering       | <input type="checkbox"/><br>Not at all | <input type="checkbox"/><br>Somewhat | <input type="checkbox"/><br>Moderately | <input type="checkbox"/><br>Very much | <input type="checkbox"/><br>Extremely |
| Feeling tired                | <input type="checkbox"/><br>Not at all | <input type="checkbox"/><br>Somewhat | <input type="checkbox"/><br>Moderately | <input type="checkbox"/><br>Very much | <input type="checkbox"/><br>Extremely |
| Nervousness or restlessness  | <input type="checkbox"/><br>Not at all | <input type="checkbox"/><br>Somewhat | <input type="checkbox"/><br>Moderately | <input type="checkbox"/><br>Very much | <input type="checkbox"/><br>Extremely |
| Feeling annoyed or irritated | <input type="checkbox"/><br>Not at all | <input type="checkbox"/><br>Somewhat | <input type="checkbox"/><br>Moderately | <input type="checkbox"/><br>Very much | <input type="checkbox"/><br>Extremely |
| Trouble sleeping at night    | <input type="checkbox"/><br>Not at all | <input type="checkbox"/><br>Somewhat | <input type="checkbox"/><br>Moderately | <input type="checkbox"/><br>Very much | <input type="checkbox"/><br>Extremely |
| Worried about the future     | <input type="checkbox"/><br>Not at all | <input type="checkbox"/><br>Somewhat | <input type="checkbox"/><br>Moderately | <input type="checkbox"/><br>Very much | <input type="checkbox"/><br>Extremely |

## QUALITY OF LIFE

### Appetite

|                                                    |                                                     |                                                      |                                            |                                                       |                                                       |
|----------------------------------------------------|-----------------------------------------------------|------------------------------------------------------|--------------------------------------------|-------------------------------------------------------|-------------------------------------------------------|
| How would you rate your appetite?                  | <input type="checkbox"/><br>Excellent               | <input type="checkbox"/><br>Very good                | <input type="checkbox"/><br>Good           | <input type="checkbox"/><br>Fair                      | <input type="checkbox"/><br>Poor                      |
| How many meals do you eat a day?                   | <input type="checkbox"/><br>1 - 2                   | <input type="checkbox"/><br>3                        | <input type="checkbox"/><br>4              | <input type="checkbox"/><br>5                         | <input type="checkbox"/><br>More than 5               |
| Has your appetite changed within the last 4 weeks? | <input type="checkbox"/><br>It's become much bigger | <input type="checkbox"/><br>It's become a bit bigger | <input type="checkbox"/><br>It's unchanged | <input type="checkbox"/><br>It's become a bit smaller | <input type="checkbox"/><br>It's become a lot smaller |
| Does food taste differently now than before?       | <input type="checkbox"/><br>No                      | <input type="checkbox"/><br>Yes, a little            | <input type="checkbox"/><br>Yes, somewhat  | <input type="checkbox"/><br>Yes, a lot                | <input type="checkbox"/><br>Don't remember            |

### General health

|                                                                          |                                                               |                                                                   |                                                            |                                                                  |                                                              |
|--------------------------------------------------------------------------|---------------------------------------------------------------|-------------------------------------------------------------------|------------------------------------------------------------|------------------------------------------------------------------|--------------------------------------------------------------|
| In general, would you say your health is:                                | <input type="checkbox"/><br>Excellent                         | <input type="checkbox"/><br>Very good                             | <input type="checkbox"/><br>Good                           | <input type="checkbox"/><br>Fair                                 | <input type="checkbox"/><br>Poor                             |
| Compared to one year ago, how would you rate your health in general now? | <input type="checkbox"/><br>Much better now than one year ago | <input type="checkbox"/><br>Somewhat better now than one year ago | <input type="checkbox"/><br>About the same as one year ago | <input type="checkbox"/><br>Somewhat worse now than one year ago | <input type="checkbox"/><br>Much worse now than one year ago |

Under each heading, please tick the ONE box that best describes your health TODAY

|                                                                              |                                                                           |                                                                               |                                                                                 |                                                                               |                                                                   |
|------------------------------------------------------------------------------|---------------------------------------------------------------------------|-------------------------------------------------------------------------------|---------------------------------------------------------------------------------|-------------------------------------------------------------------------------|-------------------------------------------------------------------|
| MOBILITY                                                                     | <input type="checkbox"/><br>I have no problems in walking about           | <input type="checkbox"/><br>I have slight problems in walking about           | <input type="checkbox"/><br>I have moderate problems in walking about           | <input type="checkbox"/><br>I have severe problems in walking about           | <input type="checkbox"/><br>I am unable to walk about             |
| SELF-CARE                                                                    | <input type="checkbox"/><br>I have no problems washing or dressing myself | <input type="checkbox"/><br>I have slight problems washing or dressing myself | <input type="checkbox"/><br>I have moderate problems washing or dressing myself | <input type="checkbox"/><br>I have severe problems washing or dressing myself | <input type="checkbox"/><br>I am unable to wash or dress myself   |
| USUAL ACTIVITIES (e.g. work, study, housework, family or leisure activities) | <input type="checkbox"/><br>I have no problems doing my usual activities  | <input type="checkbox"/><br>I have slight problems doing my usual activities  | <input type="checkbox"/><br>I have moderate problems doing my usual activities  | <input type="checkbox"/><br>I have severe problems doing my usual activities  | <input type="checkbox"/><br>I am unable to do my usual activities |
| PAIN / DISCOMFORT                                                            | <input type="checkbox"/><br>I have no pain or discomfort                  | <input type="checkbox"/><br>I have slight pain or discomfort                  | <input type="checkbox"/><br>I have moderate pain or discomfort                  | <input type="checkbox"/><br>I have severe pain or discomfort                  | <input type="checkbox"/><br>I have extreme pain or discomfort     |
| ANXIETY / DEPRESSION                                                         | <input type="checkbox"/><br>I am not anxious or depressed                 | <input type="checkbox"/><br>I am slightly anxious or depressed                | <input type="checkbox"/><br>I am moderately anxious or depressed                | <input type="checkbox"/><br>I am severely anxious or depressed                | <input type="checkbox"/><br>I am extremely anxious or depressed   |
